# Supplementary material for: Metaphor Is Between Metonymy and Homonymy: Evidence From Event-Related Potentials
Source: Front Psychol. 2020 Sep 1;11:2113. doi: 10.3389/fpsyg.2020.02113 (PMC7490628; doi:10.3389/fpsyg.2020.02113)
Supplement: Supplementary file 1 [file Data_Sheet_1.XLSX]

## Sheet: Лист1
Experimental Materials
Phrases with Polysemous Words
Metonymic Prime	Metaphorical Prime	Literal Prime	Target
мраморный ангел	сущий ангел	небесный ангел	божий ангел
‘marble angel’	‘real angel’	‘sky angel’	‘divine angel’
бушующая арена	политическая арена	ледовая арена	цирковая арена
‘raging arena of people’	‘political arena’	‘ice arena’	‘circus arena’
картонная азбука	политическая азбука	греческая азбука	славянская азбука
‘cardboard alphabet’	‘political foundations’	‘greek alphabet’	‘slavic alphabet’
спертая атмосфера	творческая атмосфера	разреженная атмосфера	земная атмосфера
‘stale air’	‘creative spirit’	‘rarefied atmosphere’	‘atmosphere of Earth’
высокий банан	надувной банан	спелый банан	вкусный банан
‘tall banana tree’	‘inflatable banana boat’	‘ripe banana’	‘delicious banana’
двухэтажный банк	донорский банк	всемирный банк	европейский банк
‘two-story bank building’	‘donor bank’	‘world bank’	‘european bank’
затяжной вирус	компьютерный вирус	нестойкий вирус	ослабленный вирус
‘protracted disease’	‘computer virus’	‘unstable virus’	‘attenuated virus’
вязаное горло	бутылочное горло	опухшее горло	больное горло
‘knitted throat’	‘bottle neck’	‘swollen throat’	‘sore throat’
цветущая груша	боксерская груша	сочная груша	спелая груша
‘flowering pear tree’	‘punching bag’	‘juicy pear’	‘ripe pear’
утомительная дорога	житейская дорога	асфальтовая дорога	проселочная дорога
‘tiresome road trip’	‘life path’	‘asphalt road’	‘country road’
остывший жар	юношеский жар	тропический жар	невыносимый жар
‘cooled coals’	‘youthful fervor’	‘tropical heat’	‘unbearable heat’
потрепанный журнал	телевизионный журнал	увлекательный журнал	научный журнал
‘shabby magazine’	‘TV series’	‘fascinating magazine’	‘science magazine’
неожиданный занавес	железный занавес	театральный занавес	роскошный занавес
‘unexpected ending’	‘iron curtain’	‘theater curtain’	‘luxury curtain’
прошитая заявка	громкая заявка	коллективная заявка	электронная заявка
‘stapled application paper’	‘high profile’	‘collective application’	‘electronic application’
дребезжащий звонок	тревожный звонок	медный звонок	дверной звонок
‘rattle sound of a bell’	‘warning sign’	‘copper bell’	‘door bell’
дубовый кабинет	электронный кабинет	врачебный кабинет	директорский кабинет
‘office in oak’	‘electronic account’	‘doctor’s office’	‘director’s office’
выцветшее клеймо	позорное клеймо	раскаленное клеймо	металлическое клеймо
‘faded mark’	‘mark of shame’	‘hot stamp’	‘metal stamp’
грузинская кухня	актерская кухня	просторная кухня	выбеленная кухня
‘Georgian cuisine’	‘inside of an acting world’	‘spacious kitchen’	‘bleached kitchen’
пластиковое окно	трехчасовое окно	панорамное окно	смотровое окно
‘plastic window’	‘three hour break’	‘panoramic window’	‘viewing window’
загипсованный перелом	исторический перелом	застарелый перелом	открытый перелом
‘gypsum fracture’	‘historical turning point’	‘chronic fracture’	‘open fracture’
восточная сладость	любовная сладость	терпкая сладость	приторная сладость
‘oriental sweets’	‘love sweetness’	‘tart sweetness’	‘sugary sweetness’
заданный урок	горький урок	открытый урок	контрольный урок
‘homework’	‘bitter lesson’	‘public lesson’	‘test lesson’
отравленная чаша	природная чаша	серебряная чаша	разрисованная чаша
‘poisoned bowl’	‘natural pool’	‘silver bowl’	‘painted bowl’
родная крыша	бандитская крыша	дырявая крыша	черепичная крыша
‘native home’	‘protection racket’	‘holey roof’	‘tile roof’
береговой огонь	творческий огонь	медленный огонь	жаркий огонь
‘light on the shore’	‘creative fire’	‘slow fire’	‘hot fire’
живописное полотно	железнодорожное полотно	расшитое полотно	шелковое полотно
‘picturesque tableau’	‘railway track’	‘embroidered canvas’	‘silk canvas’
запечатанный бальзам	живительный бальзам	облепиховый бальзам	лечебный бальзам
‘sealed balm bottle’	‘life-giving balm’	‘sea ​​buckthorn balm’	‘healing balm’
вечерняя баня	кровавая баня	натопленная баня	деревянная баня
‘evening bath’	‘blood bath’	‘heated bathhouse’	‘wooden bathhouse’
подобранная библиотека	программная библиотека	сельская библиотека	государственная библиотека
‘selected library’	‘software library’	‘rural library’	‘state library’
эффективный гипноз	нравственный гипноз	массовый гипноз	глубокий гипноз
‘effective hypnosis’	‘moral hypnosis’	‘mass hypnosis’	‘deep hypnosis’
морской горизонт	духовный горизонт	дальний горизонт	западный горизонт
‘sea ​​horizon’	‘spiritual horizon’	‘far horizon’	‘western horizon’
цветущий гранат	старинный гранат	лопнувший гранат	сладкий гранат
‘flowering pomegranate tree’	‘antique garnet’	‘bursting pomegranate’	‘sweet pomegranate’
застарелая грязь	журналистская грязь	лечебная грязь	минеральная грязь
‘old dirt’	‘journalistic dirt’	‘therapeutic mud’	‘mineral mud’
красное дерево	синтаксическое дерево	высокое дерево	молодое дерево
‘mahogany wood’	‘syntactic tree’	‘tall tree’	‘young tree’
алый закат	жизненный закат	быстрый закат	поздний закат
‘scarlet sunset’	‘sunset of life’	‘quick sunset’	‘late sunset’
мощный заряд	позитивный заряд	постепенный заряд	быстрый заряд
‘powerful charge’	‘positive attitude’	‘gradual charging’	‘fast charging’
жареный заяц	оштрафованный заяц	трусливый заяц	серый заяц
‘fried hare’	‘fined free rider’	‘cowardly hare’	‘gray hare’
тушеный кабан	прокуренный кабан	дикий кабан	раненый кабан
‘stewed boar’	‘smoking fat man’	‘wild boar’	‘wounded boar’
двухчасовой каток	сплошной каток	крытый каток	залитый каток
‘two hour skating’	‘slippery roads’	‘indoor ice rink’	‘new ice rink’
поношенная лиса	подлая лиса	голодная лиса	застреленная лиса
‘well-worn fox fur’	‘sneaky fox’	‘hungry fox’	‘shot fox’
теплое море	людское море	бескрайнее море	открытое море
‘warm sea’	‘human crowd’	‘endless sea’	‘open sea’
смазанная печать	неизгладимая печать	бронзовая печать	тяжелая печать
‘blurred stamp’	‘indelible mark’	‘bronze stamp’	‘heavy stamp’
капроновый след	незаживающий след	тормозной след	нечеткий след
‘nylon toe’	‘non-healing wound’	‘brake track’	‘fuzzy footprint’
мраморный фонтан	словесный фонтан	огненный фонтан	шоколадный фонтан
‘marble fountain’	‘flood of words’	‘fire fountain’	‘chocolate fountain’
вдохновенная кисть	виноградная кисть	беличья кисть	малярная кисть
‘inspirational brush’	‘bunch of grapes’	‘squirrel brush’	‘paint brush’
вечерний коктейль	гремучий коктейль	молочный коктейль	алкогольный коктейль
‘evening cocktail’	‘explosive mixture’	‘milkshake’	‘alcohol cocktail’
мелодичный колокольчик	лесной колокольчик	треснутый колокольчик	серебряный колокольчик
‘melodious bell sound’	‘forest bluebell’	‘cracked bell’	‘silver bell’
британская корона	солнечная корона	королевская корона	золотая корона
‘british crown’	‘Sun’s corona’	‘royal crown’	‘gold crown’
рыбный котелок	фетровый котелок	медный котелок	солдатский котелок
‘fish pot’	‘felt bowler hat’	‘copper pot’	‘soldier’s pot’
размашистый крест	жизненный крест	нательный крест	каменный крест
‘sweeping cross’	‘life burden’	‘pectoral cross’	‘stone cross’
усталый мозг	электронный мозг	здоровый мозг	головной мозг
‘tired brain’	‘electronic brain’	‘healthy brain’	‘brain in the head’
жемчужная нить	незримая нить	шелковая нить	крученая нить
‘pearl thread’	‘invisible bond’	‘silk thread’	‘twisted thread’
электронная очередь	пулеметная очередь	общая очередь	шумная очередь
‘electronic queue’	‘machine gun fire’	‘common queue’	‘noisy queue’
скользкий поворот	сюжетный поворот	правый поворот	неосторожный поворот
‘slippery turn’	‘plot twist’	‘right turning’	‘careless turning’
несвязный бред	сущий бред	наркотический бред	горячечный бред
‘incoherent nonsense’	‘pure nonsense’	‘drug delirium’	‘fever delirium’
гимнастический вес	экономический вес	удельный вес	лишний вес
‘gymnastic dumbbell’	‘economic weight’	‘specific weight’	‘excess weight’
дружная деревня	абсолютная деревня	сибирская деревня	заброшенная деревня
‘friendly village’	‘real lout’	‘siberian village’	‘abandoned village’
колючая малина	воровская малина	сладкая малина	спелая малина
‘prickly raspberry’	‘thieves’ stash’	‘sweet raspberry’	‘ripe raspberry’
мореный дуб	необучаемый дуб	могучий дуб	столетний дуб
‘oak stained wood’	‘thick-headed dunce’	‘mighty oak’	‘centenary oak’
фруктовая корзина	потребительская корзина	ивовая корзина	плетеная корзина
‘fruit basket’	‘market basket’	‘willow basket’	‘wicker basket’
вымытый коридор	валютный коридор	широкий коридор	темный коридор
‘washed corridor’	‘currency corridor’	‘wide corridor’	‘dark corridor’
перевязочный пакет	программный пакет	подарочный пакет	целлофановый пакет
‘medical dressing’	‘software package’	‘gift bag’	‘plastic bag’
сырная тарелка	летающая тарелка	глиняная тарелка	глубокая тарелка
‘cheese plate’	‘flying saucer’	‘clay plate’	‘deep plate’
Phrases with Homonymous Words
Inconsistent Prime	Consistent Prime	Target
ликвидная акция	рекламная акция	массовая акция
‘liquid share’	‘advertising campaign’	‘mass campaign’
мягкая байка	известная байка	смешная байка
‘soft fabric’	‘well-known story’	‘funny story’
военный блок	подвижный блок	деревянный блок
‘military block’	‘moving block’	‘wood block’
любительский бокс	отдельный бокс	стерильный бокс
‘amateur boxing’	‘separate box’	‘sterile box’
заводской брак	неравный брак	гражданский брак
‘manufacturing defect’	‘unequal marriage’	‘civil marriage’
аккуратный вид	распространенный вид	вымирающий вид
‘neat look’	‘common species’	‘endangered species’
полевая гвоздика	толченая гвоздика	пряная гвоздика
‘field carnation’	‘crushed clove’	‘spicy cloves’
железная гусеница	прожорливая гусеница	мохнатая гусеница
‘iron tank caterpillar’	‘gluttonous caterpillar’	‘furry caterpillar’
научная дисциплина	строгая дисциплина	трудовая дисциплина
‘scientific discipline’	‘strict discipline’	‘labor discipline’
металлическая клетка	стволовая клетка	нервная клетка
‘metal cage’	‘stem cell’	‘nerve cell’
гаечный ключ	освежающий ключ	подземный ключ
‘wrench’	‘refreshing spring’	‘underground spring’
дубовая колода	крапленая колода	карточная колода
‘oak stump’	‘marked card deck’	‘card deck’
девичья коса	галечная коса	песчаная коса
‘girl braid’	‘pebble spit’	‘sand spit’
водопроводный кран	пожарный кран	строительный кран
‘water tap’	‘fire crane’	‘construction crane’
деревянная лавка	посудная лавка	кондитерская лавка
‘wooden bench’	‘crockery store’	‘pastry shop’
натянутый лук	жареный лук	жгучий лук
‘tight bowstring’	‘fried onion’	‘burning onion’
спортивный мат	пьяный мат	трехэтажный мат
‘sports mat’	‘drunken curses’	‘gross curses’
презрительная мина	вражеская мина	противотанковая мина
‘contemptuous facial expression’	‘enemy bomb’	‘anti-tank bomb’
животный мир	семейный мир	душевный мир
‘animal world’	‘family peace’	‘peace of mind’
дипломатическая нота	высокая нота	фальшивая нота
‘diplomatic note’	‘high note’	‘fake note’
меховая опушка	заснеженная опушка	лесная опушка
‘fur collar’	‘snowy edge’	‘forest edge’
рождественский пост	городской пост	таможенный пост
‘Nativity Fast ‘	‘city ​​post’	‘customs post’
невинная проказа	неисцелимая проказа	застарелая проказа
‘innocent trick’	‘incurable leprosy’	‘chronic leprosy’
размашистая рысь	взрослая рысь	агрессивная рысь
‘fast trot’	‘adult lynx’	‘aggressive lynx’
черепичный скат	пресноводный скат	электрический скат
‘tile slope’	‘freshwater stingray’	‘electric stingray’
поэтический слог	последний слог	безударный слог
‘poetry writing style’	‘last syllable’	‘unstressed syllable’
книжная стопка	полная стопка	поминальная стопка
‘book pile’	‘full wine glass’	‘memorial wine glass’
ржаной тост	шуточный тост	поздравительный тост
‘rye toast’	‘comic toast’	‘congratulatory toast’
дымовая шашка	обнаженная шашка	казачья шашка
‘smoke bomb’	‘attacking saber’	‘cossack saber’
отборный ячмень	гнойный ячмень	болезненный ячмень
‘best barley’	‘purulent stye’	‘painful stye’
ромовая баба	румяная баба	деревенская баба
‘rum baba’	‘ruddy-faced woman’	‘village woman’
мельничный вал	оборонительный вал	крепостной вал
‘mill shaft’	‘protective rampart’	‘rampart’
гитарный гриф	тисненый гриф	министерский гриф
‘guitar fretboard’	‘embossed print’	‘ministerial print’
целебный заговор	вселенский заговор	дворцовый заговор
‘healing zagovor’	‘ecumenical conspiracy’	‘palace plot’
норвежская крона	раскидистая крона	густая крона
‘Norwegian krone’	‘sprawling tree crown’	‘thick tree crown’
турецкая лира	расстроенная лира	семиструнная лира
‘Turkish lira’	‘untuned lyre’	‘seven-string lyre’
смертный бой	фарфоровый бой	яичный бой
‘mortal battle’	‘broken china’	‘broken eggs’
недокуренный бычок	годовалый бычок	породистый бычок
‘half-smoked cigarette butt’	‘one-year-old calf’	‘pedigreed calf’
вечерний винт	воздушный винт	несущий винт
‘evening card game’	‘air propeller’	‘rotor’
колодезный ворот	косой ворот	меховой ворот
‘gate well’	‘oblique collar’	‘fur collar’
расшитый газ	природный газ	углекислый газ
‘embroidered gauze’	‘natural gas’	‘carbon dioxide’
поседевшая глава	увлекательная глава	заключительная глава
‘gray head’	‘fascinating chapter’	‘final chapter’
плавильный горн	звучный горн	пионерский горн
‘smelter’	‘sonorous bugle’	‘pioneer bugle’
неожиданный град	вольный град	древний град
‘unexpected hail’	‘free city’	‘ancient city’
любезный граф	симметричный граф	наглядный граф
‘nice count’	‘symmetric graph’	‘visual graph’
грудная жаба	толстая жаба	лесная жаба
‘angina pectoris’	‘fat toad’	‘forest toad’
шахтерский забой	массовый забой	ритуальный забой
‘mining area’	‘mass slaughter’	‘ritual slaughter’
баклажанная икра	опухшая икра	подтянутая икра
‘eggplant caviar’	‘swollen gastrocnemius muscle ‘	‘fit gastrocnemius muscle ‘
быстрый карьер	глубокий карьер	меловой карьер
‘quick gallop’	‘deep quarry’	‘chalk quarry’
мозолистый кулак	одинокий кулак	жадный кулак
‘calloused fist’	‘lonely kulak’	‘greedy kulak’
материнская ласка	кровожадная ласка	юркая ласка
‘mother’s caress’	‘bloodthirsty weasel’	‘brisk weasel’
ароматный мандарин	верховный мандарин	китайский мандарин
‘fragrant tangerine’	‘supreme mandarin’	‘chinese mandarin’
золоченый оклад	стабильный оклад	минимальный оклад
‘gilded frame’	‘stable salary’	‘minimum salary’
строгий патрон	холостой патрон	оружейный патрон
‘strict boss’	‘blank cartridge’	‘gun cartridge’
мужской пол	выкрашенный пол	кафельный пол
‘male gender’	‘painted floor’	‘tiled floor’
рекламный проспект	центральный проспект	широкий проспект
‘flyer’	‘central avenue’	‘wide avenue’
неотвратимый рок	акустический рок	танцевальный рок
‘inevitable fate’	‘acoustic rock’	‘dance rock’
костный таз	вымытый таз	эмалированный таз
‘bone pelvis’	‘washed basin’	‘enamel basin’
карликовая такса	льготная такса	официальная такса
‘miniature dachshund’	‘preferential rate’	‘official fee’
двудольный такт	педагогический такт	врожденный такт
‘bipartite beat’	‘pedagogical delicacy’	‘innate delicacy’
смещенный фокус	карточный фокус	цирковой фокус
‘shifted focus’	‘card trick’	‘circus trick’
персидский шах	двойной шах	неожиданный шах
‘persian shah’	‘double check’	‘unexpected check’
мелкоклеточный рак	вареный рак	речной рак
‘small cell cancer’	‘boiled crayfish’	‘crayfish’
